# Supplementary figures and images for: CryoEM structure of the type IVa pilus secretin required for natural competence in Vibrio cholerae
Source: Springer Nature journal article supplement (doi:10.1038/s41467-020-18866-y), 2020-10-08

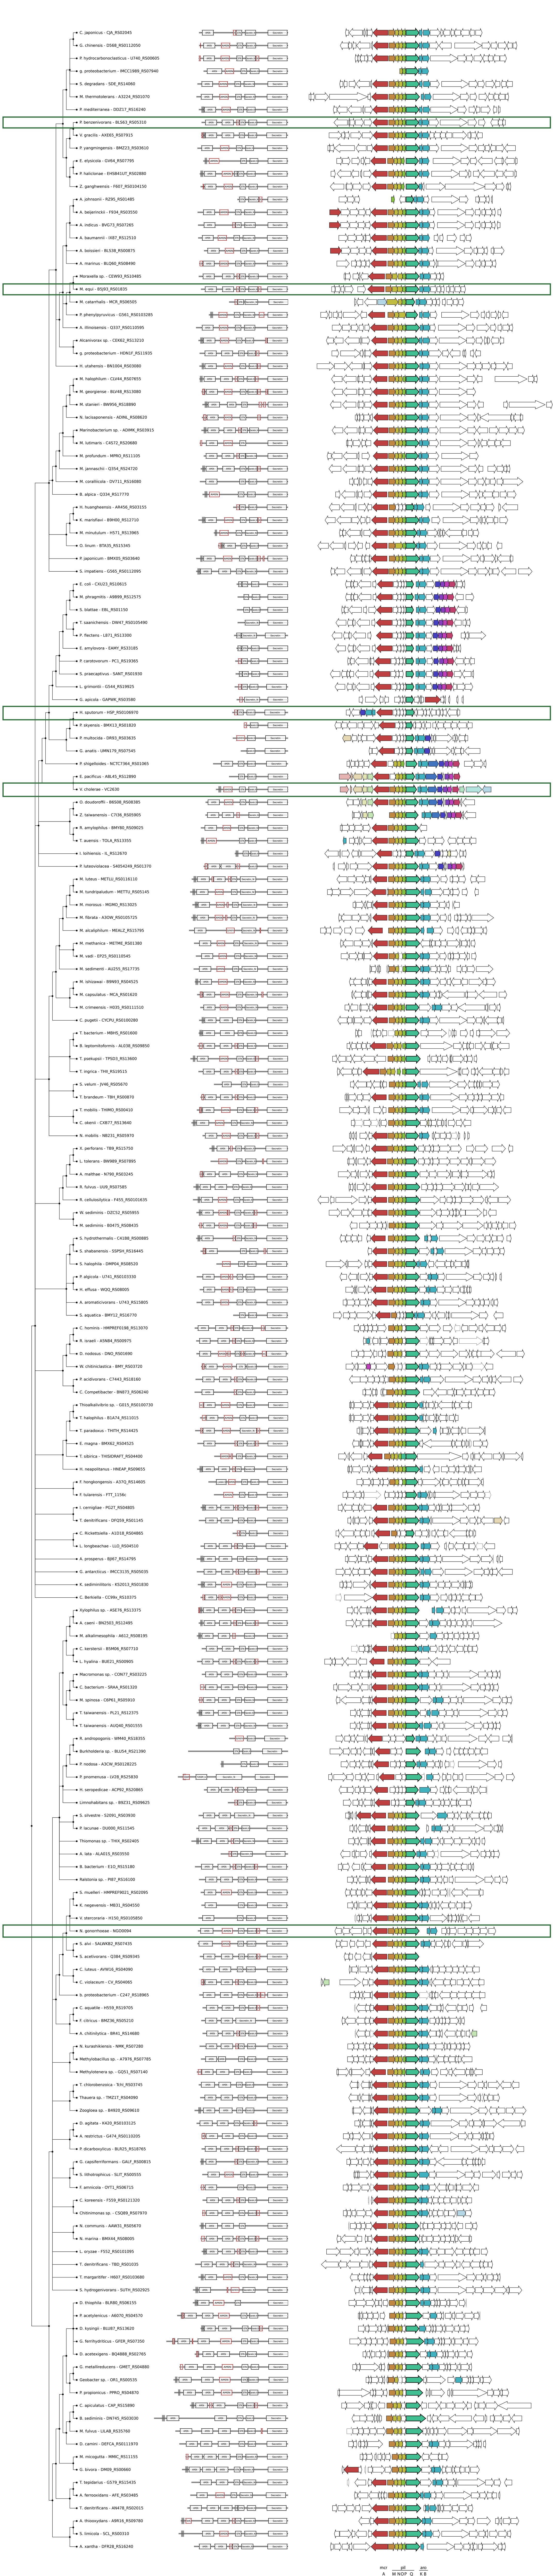

Supplement: MOESM3 [file 41467_2020_18866_MOESM3_ESM.zip]
